# Supplementary material
Source: PubMed Central journal article supplement (PMC2713125)

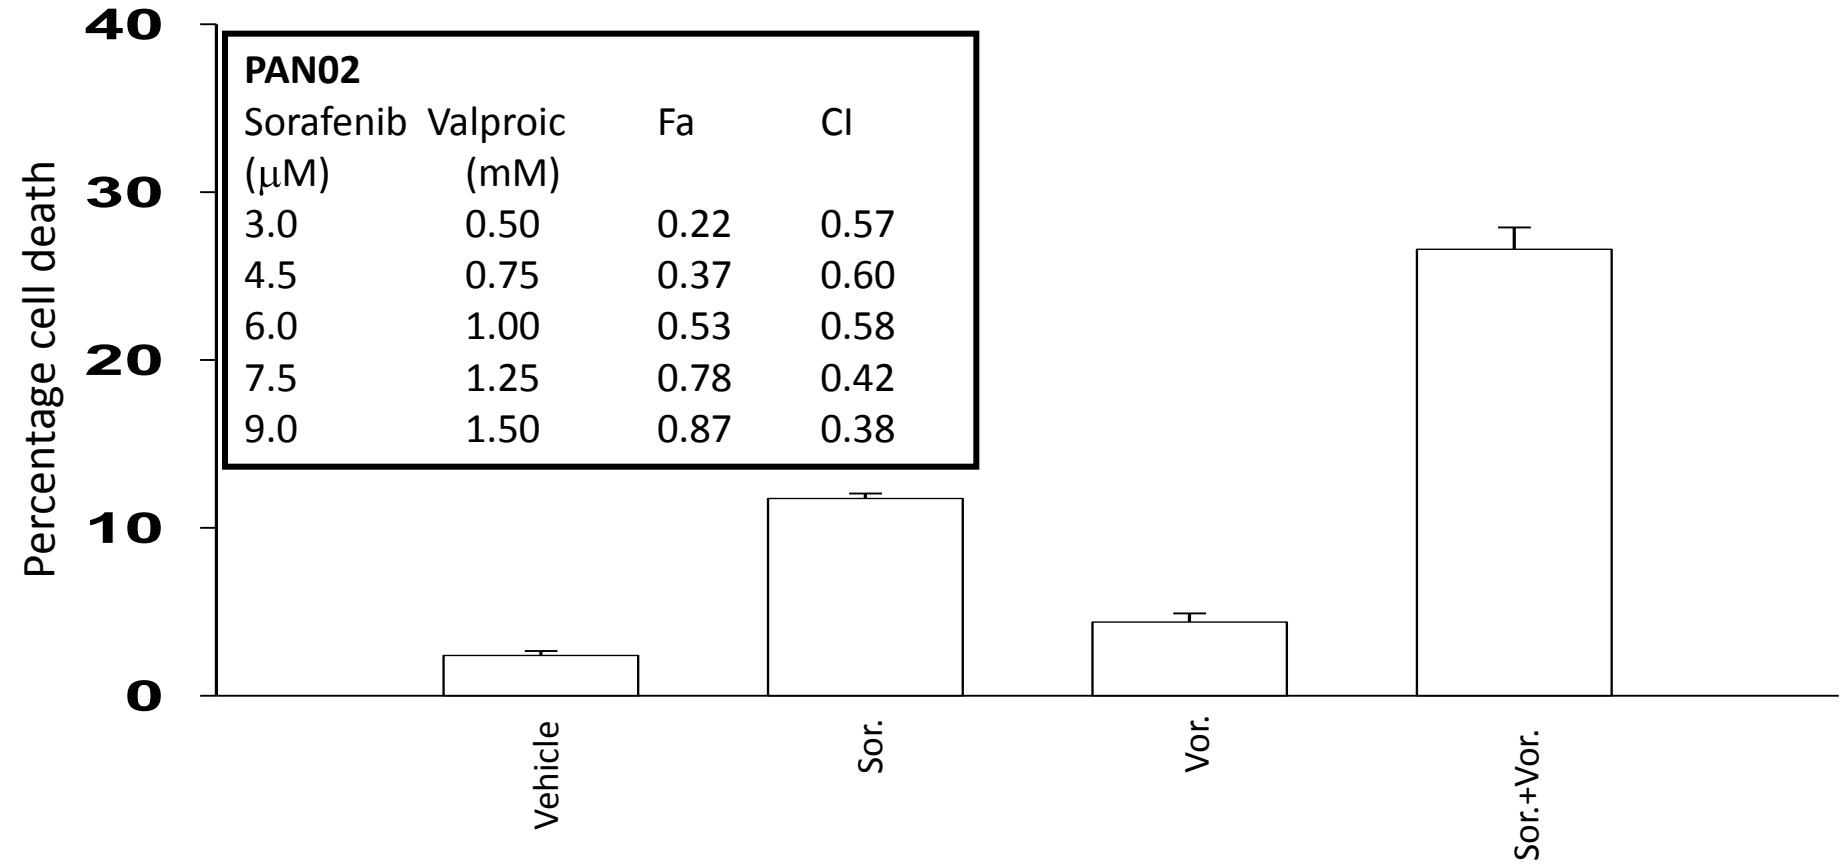

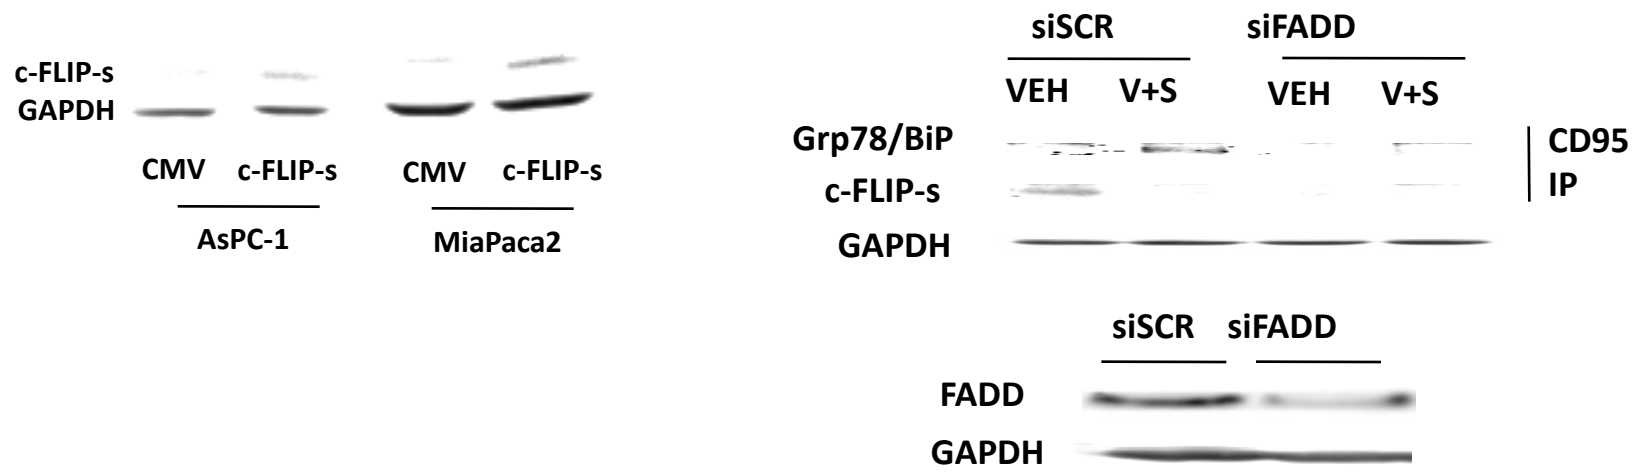

**PANC1**

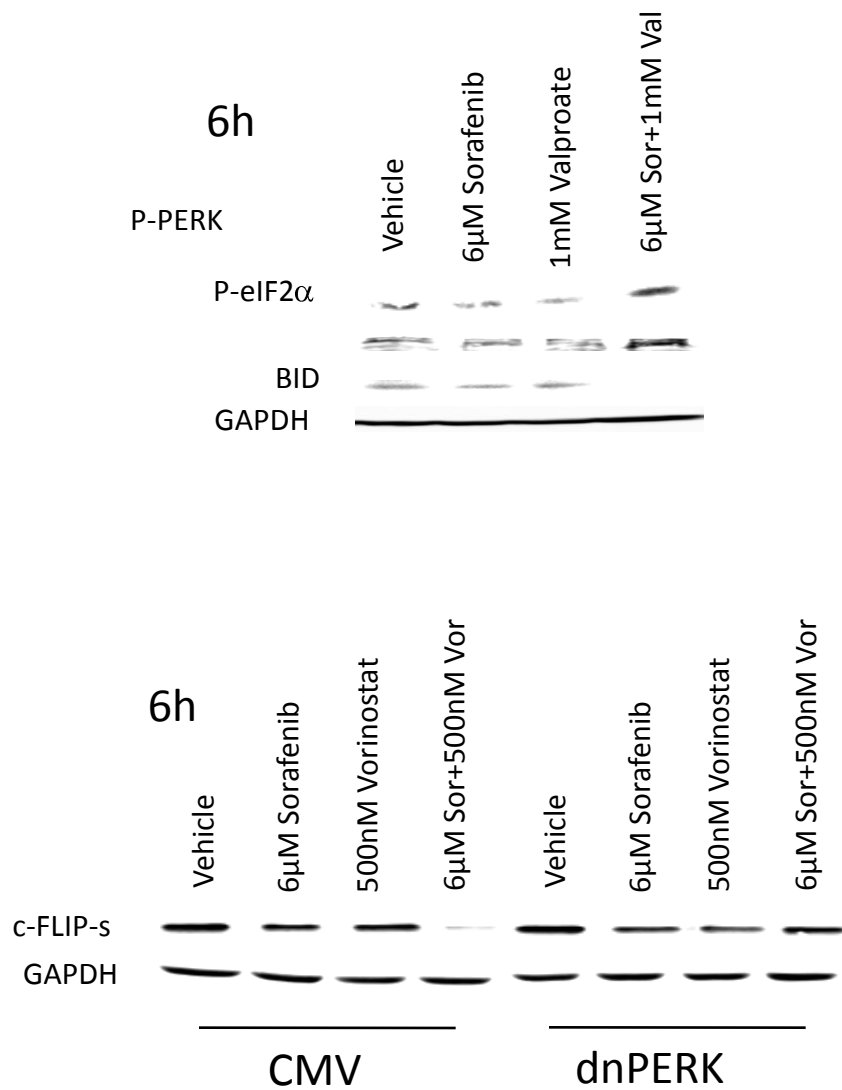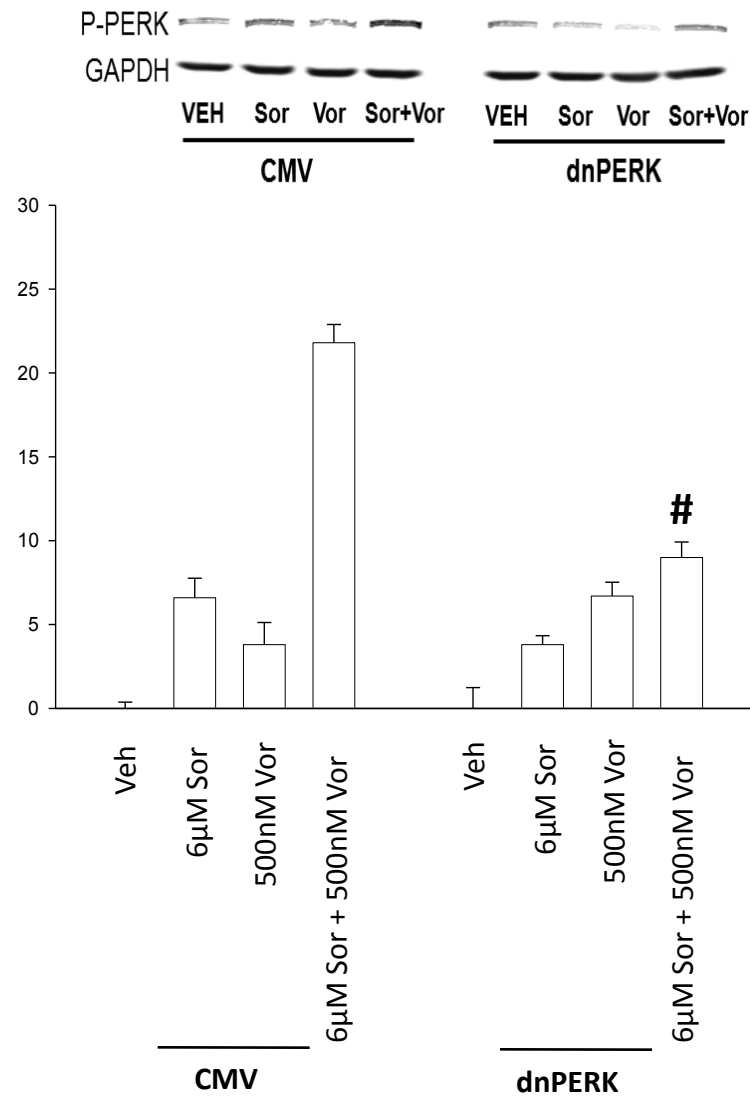

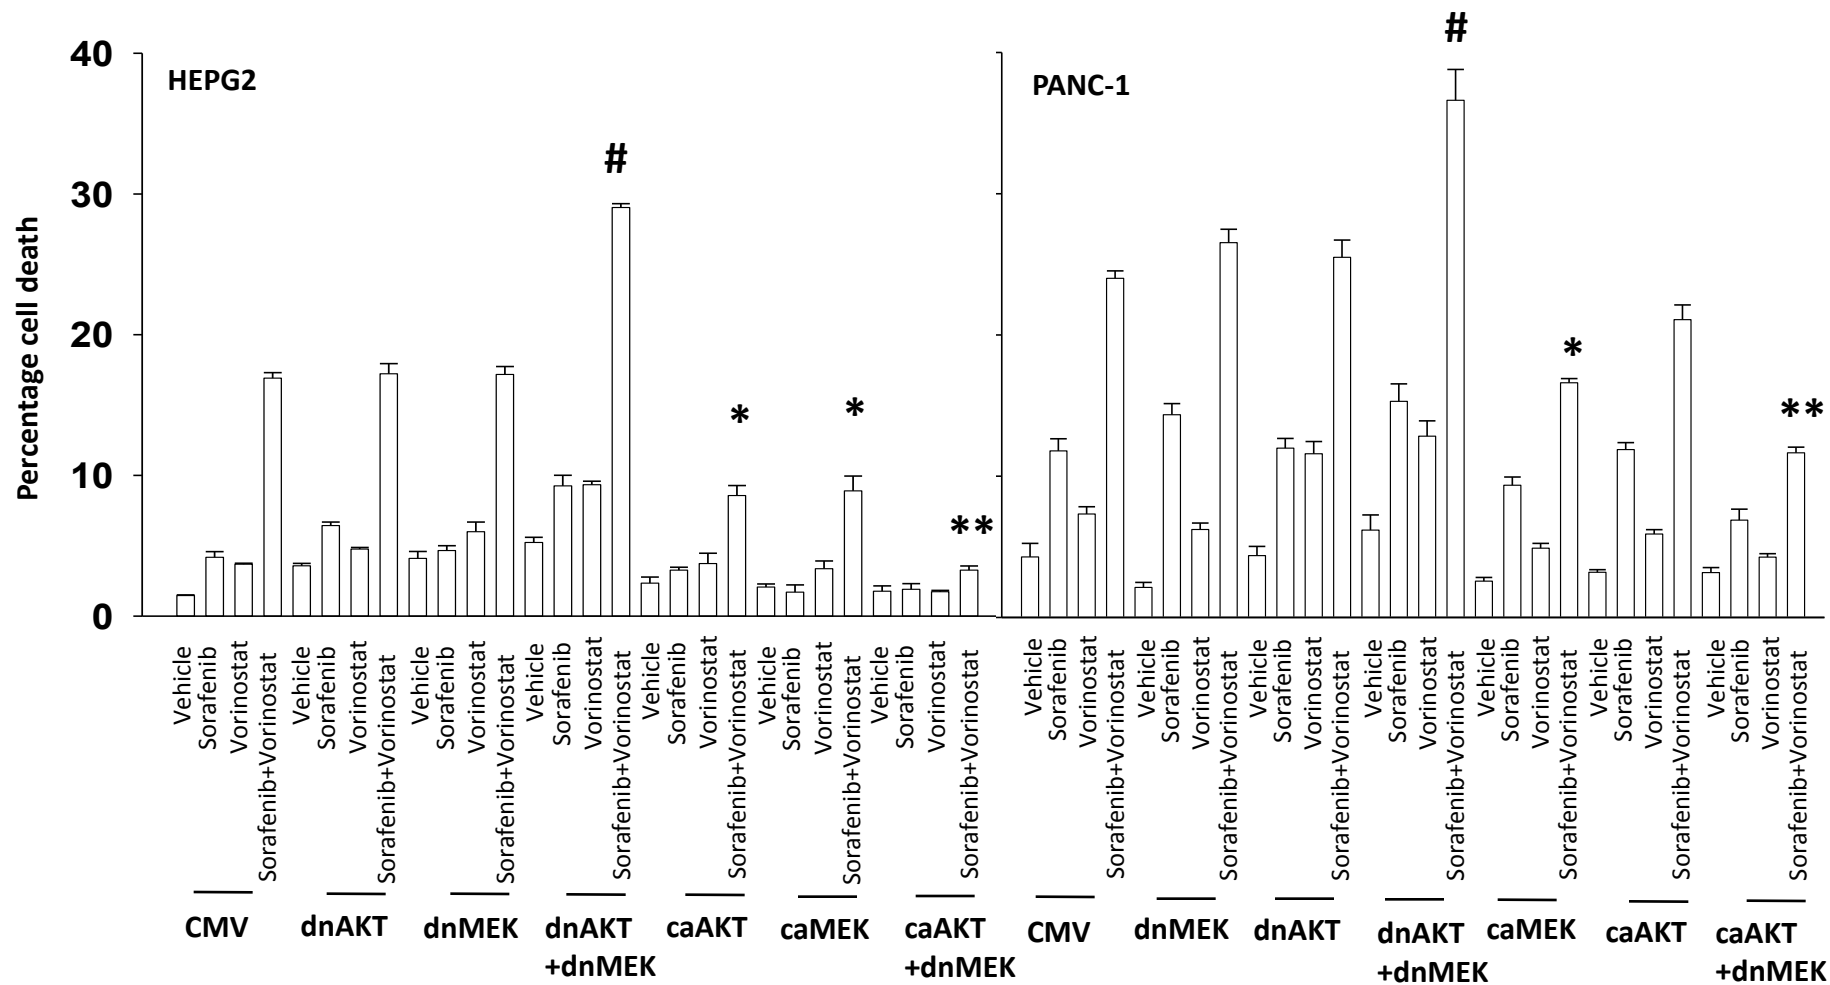

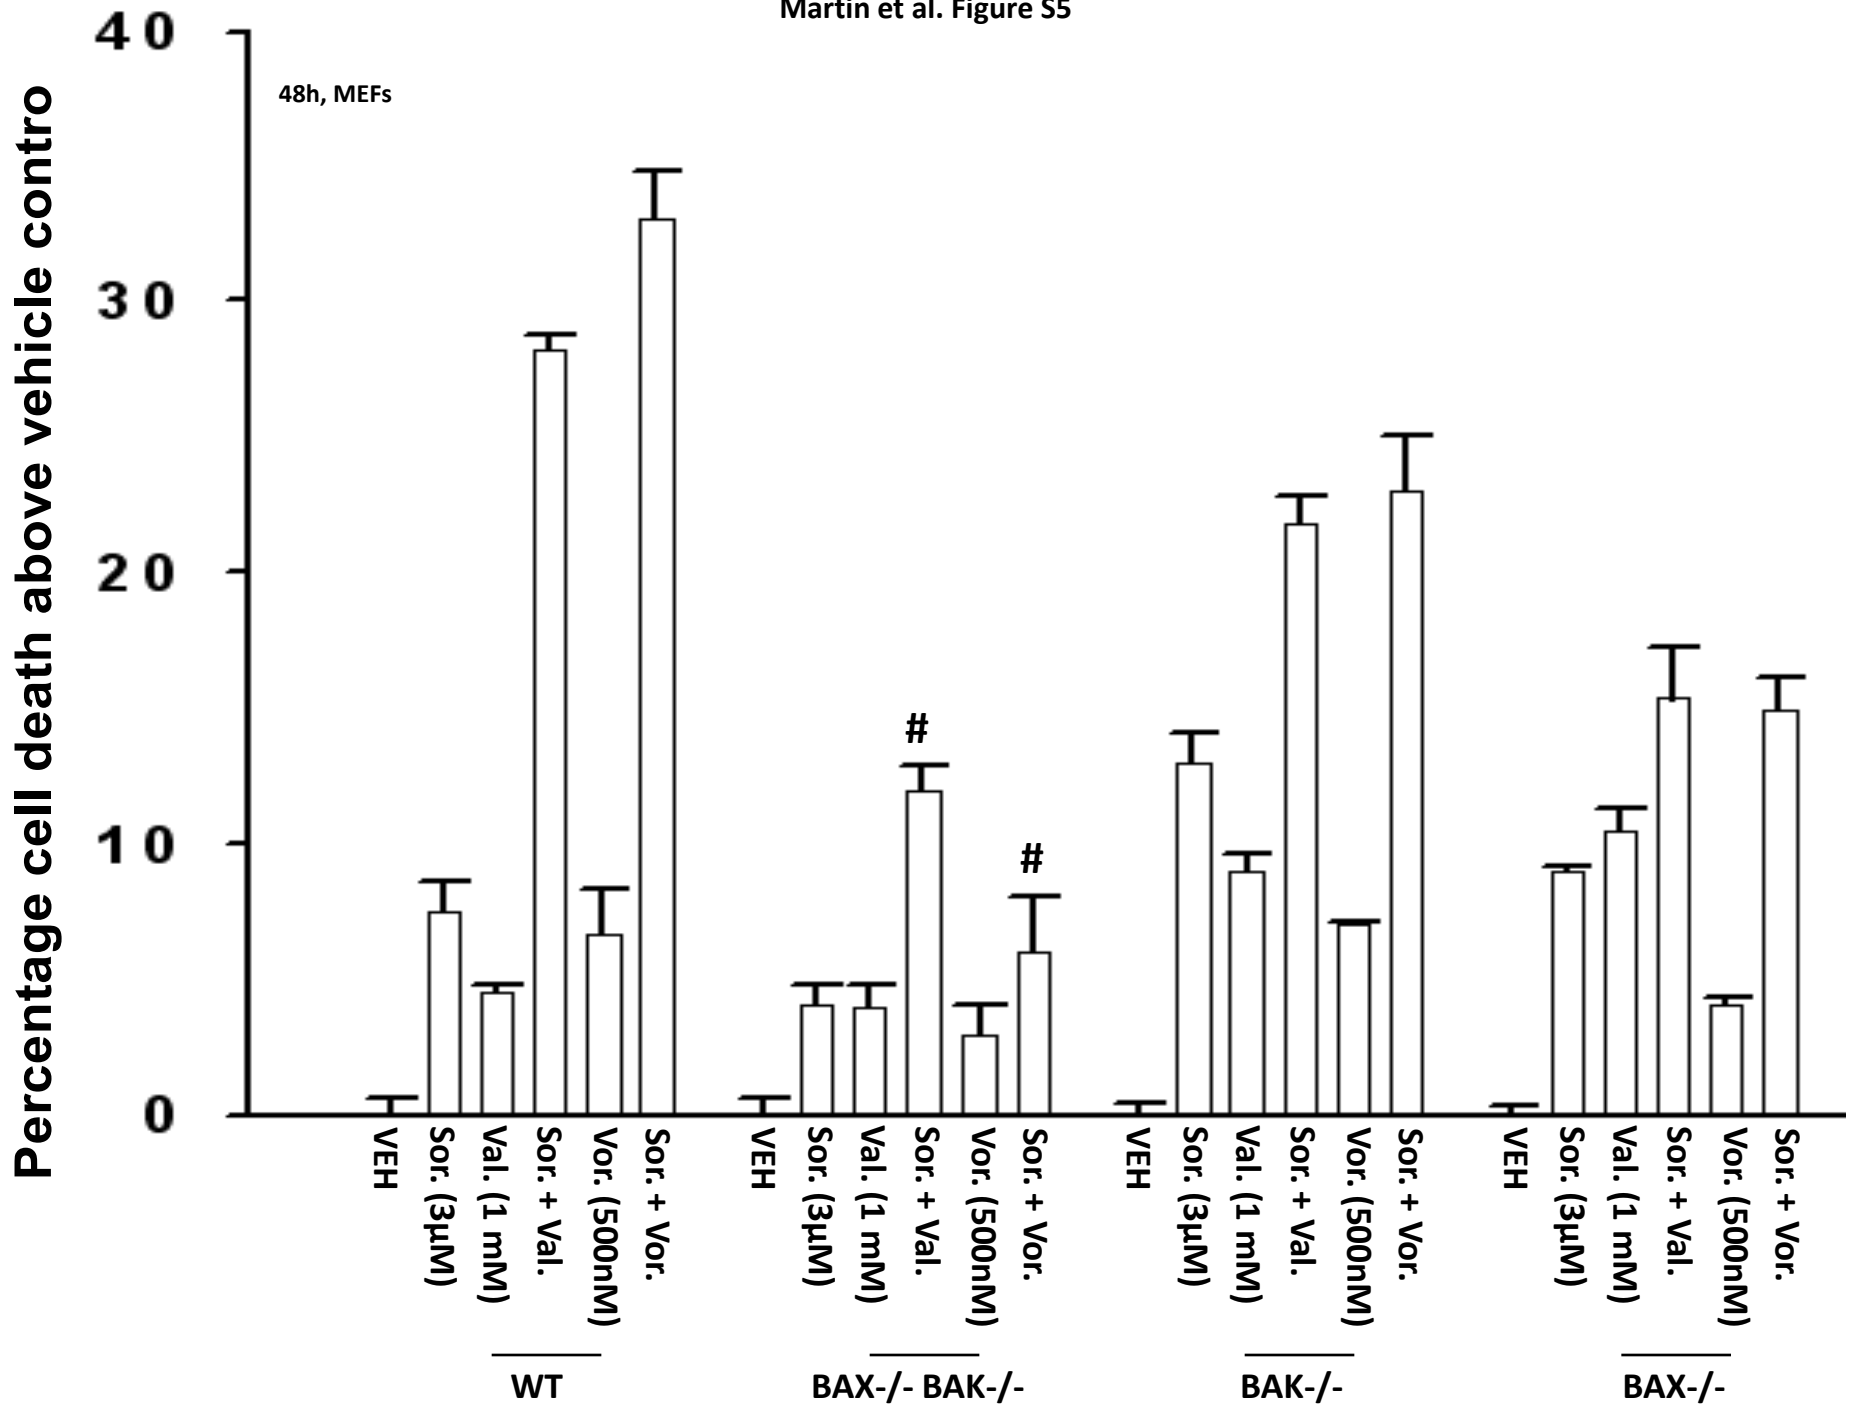

Supplement: mol.109.056309_1.pdf [file mol.109.056309_1.pdf]
